# Supplementary material for: Association Between Beta-Blocker or Statin Drug Use and the Risk of Hemorrhage From Cerebral Cavernous Malformations
Source: PubMed Central journal article supplement (PMC9311291; doi:10.1161/strokeaha.121.037009), 2022-04-13
Supplement: str-53-2521-s002.pdf [file str-53-2521-s002.pdf]

## **SUPPLEMENTAL MATERIAL**

## **Table of contents**

**Table S1. Overview of medication use and outcome events.**

**Table S1. Overview of medication use and outcome events.**

| <b>Antithrombotic use</b> | <b>Statin use</b> | <b>Beta-blocker use</b> | <b>Primary outcome (ICH or FND)</b> | <b>Secondary outcome (ICH)</b> |
|---------------------------|-------------------|-------------------------|-------------------------------------|--------------------------------|
| yes                       | no                | no                      | 0 (n=10)                            | 0 (n=11)                       |
| yes                       | no                | yes                     | 0 (n=11)                            | 0 (n=11)                       |
| yes                       | yes               | no                      | 1 (n=21)                            | 1 (n=21)                       |
| yes                       | yes               | yes                     | 0 (n=19)                            | 0 (n=19)                       |
| no                        | yes               | no                      | 3 (n=23)                            | 2 (n=23)                       |
| no                        | yes               | yes                     | 0 (n=10)                            | 0 (n=10)                       |
| no                        | no                | no                      | 25 (n=183)                          | 16 (n=182)                     |
| no                        | no                | yes                     | 1 (n=23)                            | 0 (n=23)                       |

ICH; intracranial hemorrhage, FND; focal neurological deficit.
